# Supplementary material for: Protocol for a double-blind randomised controlled trial of low dose intradermal grass pollen immunotherapy versus a histamine control on symptoms and medication use in adults with seasonal allergic rhinitis (PollenLITE)
Source: PubMed Central journal article supplement (PMC3765857; doi:10.1186/2045-7022-3-27), 2013-08-21
Supplement: 2045-7022-3-27-S2.pdf [file 2045-7022-3-27-S2.pdf]

## ADDITIONAL INFORMATION

Global evaluation scores: to be completed September 2013

### Global Evaluation No. 1

Sept 2013 visit

The subject should be asked: "How do you assess the severity of your rhinoconjunctivitis symptoms when they were the most severe during this grass pollen season (Tick each single symptom)?"

| Rhinoconjunctivitis/<br>Hayfever symptom |              | Symptoms |          |              |            |
|------------------------------------------|--------------|----------|----------|--------------|------------|
|                                          |              | 0 (None) | 1 (Mild) | 2 (Moderate) | 3 (Severe) |
| Nasal Symptoms                           |              |          |          |              |            |
| 1.                                       | Runny nose   |          |          |              |            |
| 2.                                       | Blocked nose |          |          |              |            |
| 3.                                       | Sneezing     |          |          |              |            |
| 4.                                       | Itchy nose   |          |          |              |            |
| Eye symptoms                             |              |          |          |              |            |
| 1.                                       | Itchy eyes   |          |          |              |            |
| 2.                                       | Watery eyes  |          |          |              |            |

### Global Evaluation No. 2

Sept 2013 visit

The subject should be asked: "How was your hayfever this year compared with years before you started immunotherapy treatment (Tick only one)?"

| Assessment          |                |                         |                 |                        |               |                    |
|---------------------|----------------|-------------------------|-----------------|------------------------|---------------|--------------------|
| Much better<br>(+3) | Better<br>(+2) | A little better<br>(+1) | The same<br>(0) | A little worse<br>(-1) | Worse<br>(-2) | Much worse<br>(-3) |
|                     |                |                         |                 |                        |               |                    |
